# Supplementary material
Source: PubMed Central journal article supplement (PMC4286047)
Supplement: rspb20141396supp1.pdf [file rspb20141396supp1.pdf]

# Supplementary Information

## S1 Critique of previous analyses and rationale for new analysis

### S1.1 Pseudo-replication

The two most recent analyses of the organic to conventional yield gap utilized the yield ratios without always taking into account the underlying data structure, leading to potential pseudo-replication and an understated Type 1 error rate [1, 2].

The random effect meta-analysis employed by Seufert et al. [1] assumes that effect sizes are independent and drawn from a common distribution [3]. However, multiple response ratios were extracted from studies without nesting these observations. Doing so may violate the assumption of independence, since multiple response ratios from the same study may be non-independent. In addition, treating response ratios from the same study as independent gives the studies with the most response ratios disproportionate weight while also inflating the replication and hence artificially reduces the confidence region of the analysis. Further, in approximately 60% of studies, one set of yield data was used as the baseline for multiple comparisons and these were then treated as independent data points. Treating response ratios that incorporate the same baseline as independent data points also violates assumptions of independence for meta-analysis [4, 5].

The de Ponti et al. [2] study had similar issues with pseudo-replication. Additionally they did not account for the sampling variance within studies, which is the recommended practice to deal with unequal variances in the sample of studies [6].

22 Because we constructed a random effects model (Eq. S1) and conducted the same categor-  
23 ical comparisons as Seufert et al. [1], we first investigated the effects of not accounting for  
24 the hierarchical data structure on the Type 1 error rate for the Seufert et al. model. We also  
25 investigated how much of the difference in our results was due to the hierarchical model-  
26 ing approach, versus the additional data in our study. We did not investigate the de Ponti  
27 et al. [2] analysis in detail because its structure was entirely different from ours.

## 28 **S1.2 Re-analysis of Seufert et al. data**

29 In order to estimate the Type I error rate of the Seufert et al. analysis, we used a ran-  
30 domization test. We forced the null hypothesis to be true by randomly re-assigning the  
31 'organic' and 'conventional' labels for each study and then using the R package Metafor  
32 [7] to implement a random effects meta-analysis on each randomized dataset. Repeating  
33 this procedure  $10^5$  times enabled us to determine the Type I error rate (false rejection)  
34 resulting from not accounting for the hierarchical structure of the data. In over 50% of  
35 simulations, the null hypothesis was rejected using a nominal Type I error rate of 0.05  
36 (Fig. S1). In other words, even if organic and conventional yields are known not to be  
37 different, applying the model used by [1] for these data would lead to the conclusion that  
38 they are significantly different in over 50% of cases. This means that the actual Type I error  
39 rate is inflated relative to what was reported, leading to the following related statements:  
40 the significance levels were overstated; the confidence intervals were underestimated;  
41 the uncertainty was not fully accounted for. This is a likely explanation for why these au-  
42 thors found many significant differences between explanatory variables for management,  
43 study quality, and crop type, whereas we did not.

### 44 **S1.3 How much are differences in results due to the model or the data?**

45 We conducted a series of tests to evaluate the extent to which differences between our  
46 results and those of Seufert et al. [1] depended on the model we use or the differences  
47 among the datasets (the Seufert et al. data was a subset of the data we used).

48 First, we re-analyzed Seufert et al.'s [1] data (316 comparisons from 66 studies) with their  
49 non-nested model in a Bayesian framework in order to verify that any differences in pa-  
50 rameter estimates were not attributable to a change in statistical paradigms. The non-  
51 nested, random effects meta-analytic model is:

$$\begin{aligned}y_i &= \mu + \alpha_i + \epsilon_i \\ \alpha_i &\sim N(0, \sigma_\alpha^2) \\ \epsilon_{ijk} &\sim N(0, S_{ijk})\end{aligned}\tag{S1}$$

52 where  $y_i$  is the observed effect of the  $i^{\text{th}}$  response ratio,  $\mu$  is the average true effect,  $\alpha_i$  is  
53 the random effect of study  $i$ ,  $\epsilon_i$  is the residual,  $\sigma_\alpha^2$  is the between-study variance in true  
54 effect sizes [3]. The value of  $S_{ijk}$  is estimated by the reported standard error of the effect  
55 in study  $i$ .

56 We implemented the non-nested model using a Bayesian framework using JAGS inter-  
57 faced via the package `rjags` [8, 9]. The yield gap estimate of the Bayesian and frequentist  
58 non-nested models using Seufert et al.'s data did not differ quantitatively (compare a and  
59 b, Fig. S2).

60 Next, we re-analyzed Seufert et al.'s [1] data with our nested model, accounting for the  
61 hierarchy in the meta-dataset. Our re-analysis shrunk the yield gap by 4 percentage points  
62 and increased the uncertainty around these estimates (Fig. S2c).

63 Next, using our larger data-set we implemented their non-nested model in a Bayesian  
64 and frequentist framework. The frequentist analysis was implemented in the R package  
65 `metafor`. The non-nested analysis on our more comprehensive dataset gave an estimate  
66 of the organic to conventional ratio almost identical to Seufert et al. [1]’s original results  
67 using both frequentist (Fig. S2d) and Bayesian approaches (Fig. S2e).

68 Finally, our model with our expanded dataset (1071 comparisons from 115 studies) shrinks  
69 the estimate of the yield gap an additional 2% in comparison to the estimate using Seufert  
70 et al.’s data and our model (Fig. S2f). The variance around the estimate also shrinks  
71 slightly (compared to c), as expected with a larger data-set. Thus, difference in methods  
72 is twice as important as the difference in data in determining the reduction in the estimate  
73 of the organic to conventional yield gap between Seufert et al.’s analysis and ours.

## 74 **S2 Building our meta-analytic model**

### 75 **S2.1 Modeling framework**

76 We chose to use a Bayesian modeling framework because the existing Markov chain  
77 Monte Carlo sampling methods [8] enabled us handle the complexity of the hierarchical  
78 model we constructed. Such methods did not exist for frequentist analyses at the time the  
79 analyses were conducted. Because the posterior is the product of the likelihood and the  
80 prior, when using uninformative (flat) priors as we have done here, the posterior should  
81 be approximately calibrated to frequentist results.

## 82 **S2.2 Effect size**

83 We chose to use the response ratio (the ratio of the mean outcome of the treatments of  
84 interest) because it quantifies the proportional difference between the treatments (in this  
85 case, the organic and conventional yields). In our analyses we used the natural logarithm  
86 of the response ratio because (1) it has an approximately normal sampling distribution,  
87 whereas the sampling distribution of the raw response ratio is skewed, and (2) deviations  
88 in the numerator and the denominator hold equal weight [10]. We then back transformed  
89 the model output to facilitate interpretation.

## 90 **S2.3 Random/mixed model**

91 In a random and mixed effects meta-analytic models, the true study effects are assumed  
92 to come from a common distribution and, thus, such models provide inferences about the  
93 larger population of possible studies from which those included in the actual analysis are  
94 a random sample [11].

95 In contrast to random and mixed effects models, fixed effect models assumes there is little  
96 heterogeneity of effect size estimates between studies. The study effects are therefore not  
97 modeled as being drawn from a common distribution. We did not conduct any fixed  
98 effect analyses because, when using fixed-effects models, the goal is to make a conditional  
99 inference only about the studies included in the meta-analysis [11].

## 100 **S2.4 Parameter inclusion**

101 To determine the levels of hierarchy supported by the data, we sequentially added ran-  
102 dom effects and examined the posteriors of the parameters to determine the support for

103 their inclusion. We also confirmed our selection with Deviance Information Criterion  
104 (DIC). The DIC can be problematic for hierarchical models because the effective number  
105 of parameters is not clearly defined [12, 13]. The DIC was therefore used in combination  
106 with a visual examination of the posterior distributions of the parameters to select the  
107 best supported model.

108 For the variance within and between year random effect distributions, we considered two  
109 parameterizations: 1) the variance terms, denoted  $\sigma_\eta^2$  and  $\sigma_\beta^2$ , respectively, were shared  
110 across all studies each with a Uniform(0,100) prior, and 2) the variance terms were study-  
111 specific (i.e.,  $\sigma_\eta^2[i]$  and  $\sigma_\beta^2[i]$ ). In the latter case, the study-specific precision terms (1/variance)  
112 were assumed to be distributed according to a gamma distribution whose param-  
113 eters were estimated. Uniform(0,100) priors were used for the coefficient of variation  
114 ( $1/\sqrt{\text{shape}}$ ) and the square root of the scale.

115 We first added a random effect of study and examined the posterior for  $\sigma_\alpha$  (the stan-  
116 dard deviation of the common distribution from which the study effects are drawn). The  
117 posterior was clearly differentiated from zero (Fig. S6a). We next added random variation  
118 within a year and examined  $\sigma_\eta$ . We found it was also clearly different from zero (Fig. S6b).  
119 The DIC was also smaller than when only a random effect of study was included (Tab. S1).  
120 Next we allowed the within-year precisions to be study-specific and follow a gamma dis-  
121 tribution. We examined the coefficient of variation of the gamma distribution and found  
122 it was clearly differentiated from zero (Fig. S6c). The DIC was also smaller than when a  
123 single within year effect was shared across studies (Tab. S1). Lastly, we added a between  
124 year random effect and examined  $\sigma_\beta$ . The posterior was concentrated at zero (Fig. S6d) so  
125 we concluded there was insufficient support for including it in the model. The estimate  
126 of the yield gap and its uncertainty did not differ substantially from when no between  
127 year effect was included (Fig. S7), the DIC, however, was marginally smaller then when

128 no between year random effect was included (Tab. S1).

## 129 **S2.5 Weighting**

130 The estimates of effect size from different studies will differ in their precision, or standard  
131 error. To handle these differences in precision, the sampling variance from each study are  
132 used as an estimate of the precision of the response ratio [3, 6, 10, 11, 14]. The variance of  
133 a response ratio is equal to

$$\frac{SD_{org}^2}{N_{org}\bar{X}_{org}^2} + \frac{SD_{conv}^2}{N_{conv}\bar{X}_{conv}^2} \quad (S2)$$

134 Where SD is the standard deviation,  $\bar{X}$  is the mean and N is the sample size of the organic  
135 and conventional treatments [10]. This weighting increases the power of the test and the  
136 precision of the combined estimate [6]. We therefore use the estimated variance of log  
137 response ratios [10] to weight our effect sizes.

138 We tested the sensitivity of the analysis to weighting by implementing a non-nested, un-  
139 weighted model using a frequentist framework [7] (our nested model does accommodate  
140 unweighted variances). The mean estimate of the unweighted, non-nested model was  
141 the same as the weighted, non-nested model, but the confidence intervals around the  
142 parameter estimate were slightly smaller (Fig. S2g).

In many multi-year studies, we could not obtain the within-year variance among obser-  
vations. In these cases, the variance of the means across years was used as an estimate of  
the observation-level sampling variance (which was also how [1] combined such data).  
Because this variance estimate lumps the between-year variation and the sampling vari-

ation together, it is an overestimate of the sampling variance. For example, for a single study with multiple years,

$$y_i = \mu + \beta_i + \epsilon_i, i = 1, \dots, n \quad (\text{S3})$$

$$\epsilon_i \sim N(0, \sigma_{\epsilon,i}^2) \quad (\text{S4})$$

$$\beta_i \sim N(0, \sigma_{\beta}^2) \quad (\text{S5})$$

143 where  $y_i$  is the log response ratio of the  $i^{\text{th}}$  year of a study,  $\mu$  is the average,  $\epsilon_i$  is the residual  
 144 due to sampling variation,  $\sigma_{\epsilon,i}^2$  is the sampling variance in year  $i$ ,  $\beta_i$  is the random effect  
 145 of the  $i^{\text{th}}$  year, and  $\sigma_{\beta}^2$  is the variance of the distribution from which the year effects are  
 146 drawn. The sample variance of the  $y_i$  is an estimate of the between-year variance ( $\sigma_{\beta}^2$ ) plus  
 147 the average of the sampling variances ( $\sigma_{\epsilon,i}^2$ ). In a mixed or random effects meta-analysis,  
 148 this becomes the estimate of the within-study variance ( $\sigma_i^2$ ).

149 We conducted the hierarchical meta-analysis with and without the studies that reported  
 150 only a between-year variance to examine the potential bias that under-weighting some  
 151 studies might introduce. Excluding the studies that only provided the between-year vari-  
 152 ance decreased our meta-dataset to 56 studies and 839 observations. The yield gap esti-  
 153 mated from the subset of the data was only 2 percentage point larger than the estimate  
 154 from the full dataset with a 1.6 percentage point increase in the estimate of the variance  
 155 (S2, compare f and h), as expected with less data. Including the studies without a true  
 156 observation-level sampling variance estimate, therefore, does not substantially change  
 157 our estimate of the yield gap.



## 158 **S2.6 Sampling dependence**

159 Studies included in meta analyses often employ ANOVA-style designs where multiple  
160 treatments are compared against a single control. In these cases, a response ratio can be  
161 calculated for each control-treatment pair. These response ratios, however, are not in-  
162 dependent, because they share a common control and therefore should not be included  
163 separately in an analysis [4, 5]. When response ratios shared a common control, we cal-  
164 culated a combined response ratio ( $y_{ijk}$ ) and corresponding standard error ( $\sigma_{ijk}$ ) for the  
165 entire study using the method presented in [Eq. 3 & 8, 4]. In the analysis with no explana-  
166 tory variables, 63% of the data were combined using the Lajeunesse method.

167 If the response ratios are grouped separately among categories in a mixed effects model  
168 the bias introduced by non-independence is minimized because the response ratios are  
169 not pooled together [4]. Therefore we did not aggregate response ratios in the analyses  
170 including explanatory variables when the response ratios were in different levels of the  
171 explanatory variable.

## 172 **S3 Meta-datasets and publication bias**

173 The inclusion criteria and the timing of literature searches differed between our study  
174 and that of de Ponti et al. [2] and Seufert et al. [1] and thus the meta-data sets vary in their  
175 coverage (Fig. S8). We used similar inclusion criteria to Seufert et al. but excluded (1)  
176 comparisons of organic yields with subsistence yields because the latter do not represent  
177 conventional agriculture, and (2) comparisons of yields not from the same year. Our meta-  
178 dataset encompasses 115 studies published between 1977 and 2012, of which Seufert et  
179 al.'s meta-data set is a subset (66 studies from 1980 to 2010). Unlike our study and that of

180 Seufert et al., de Ponti et al. included studies that did not report an estimate of sampling  
181 variance. de Ponti's less strict exclusion criteria enabled them to include 156 studies from  
182 1989 to 2010.

183 For all three studies, we found that study publication year is correlated with the yield  
184 ratio (Fig. S9). Specifically, there is a trend towards larger yield gaps with conventional  
185 out-performing organic in more recent studies. This effect is most pronounced in the data  
186 used by Seufert et al., but is also present in de Ponti et al.'s and our own meta-dataset. This  
187 trend could result from conventional yields increasing relative to organic yields through  
188 time. Historically, research and development of organic cropping systems has been ex-  
189 tensively underfunded relative to conventional systems [15–17], so it is not inconceivable  
190 that continued investment in conventional techniques has widened the yield gap through  
191 time.

192 The same trend could also result if a publication bias favoring studies that report higher  
193 conventional yields has increased through time. Not all studies are submitted for pub-  
194 lication and, of those that are, not all are accepted. Publication bias will result if stud-  
195 ies that show significant results are preferentially submitted and published, or if studies  
196 are suppressed because the findings do not align with the interests of the researchers or  
197 funding sources [18]. A bias would also result if researchers are choosing study systems  
198 which they expect to show larger differences, and thus there is a bias in what studies are  
199 conducted. Conversely, a bias would occur if the crop species of greatest interest to re-  
200 searchers is one that exhibits a large yield gap (e.g., cereals). Interesting, the proportion of  
201 studies on cereals in the literature has increased through time (Fig. S10), which could ex-  
202 plain both the bias toward studies that report higher conventional yields and the increase  
203 in the gap through time.

204 We visually assessed bias in our dataset and in the subset of data comprising the Seufert

205 et al. data using a funnel plot and QQ-plot [6]. Asymmetrical funnel plots may indicate  
206 a systematic difference between smaller and larger studies (“small study effects”) which  
207 may be due to publication bias [6, 18]. Our funnel plot revealed a slight asymmetry fa-  
208 voring small studies that report conventional yields are higher relative to organic, Fig.  
209 S11a). The QQ-plot confirmed this observation: the observed quantiles are first below  
210 then above the expected line, suggesting the observed data is gaining quantiles faster than  
211 expected under a Gaussian model (Fig. S11b). This is because in the observed quantiles,  
212 there is more mass in the tail compared to normally distributed data (i.e., the distribution  
213 of response ratios is fat-tailed). That the lower quantiles are further from the line and even  
214 steeper suggests that there is more mass in the lower tail (i.e., where conventional yields  
215 are higher than organic). A fat-tailed distribution of response ratios could be due to bias.  
216 Funnel and QQ-plots of the subset of data used by Seufert et al. were similar.

217 All of these assessments suggest that there is bias in the literature favoring studies that re-  
218 port conventional yields out-performing organic. Our results should therefore be viewed  
219 as a potential overestimate of the yield gap. It is unclear, however, whether this bias is  
220 due to publication bias or another type of bias such as a bias in what studies were con-  
221 ducted.

## 222 **S4 Explanatory variable inclusion**

223 To examine the support for including different explanatory variables in a model, various  
224 forms of model selection can be employed to compare models that contain different com-  
225 binations of explanatory variables (e.g., [19]). Because the studies in our analysis did not  
226 consistently report many characteristics we wished to include in our model (e.g., nitro-  
227 gen input, rotation type, tillage), we were unable to use such an approach, as it requires

228 that the data are consistent across models. We instead analyzed each explanatory vari-  
229 able separately. Although not ideal, it is not possible to include all explanatory variables  
230 investigated here in one model and still use a traditional model selection framework. Or-  
231 ganic and conventional yields were deemed significantly different from each other if the  
232 95% credible interval of the yield ratio did not overlap one. Different levels of explanatory  
233 variables were considered to be significantly different if the posterior of the 95% credible  
234 interval of the difference between the group means did not overlap zero.

## References

- [1] Seufert, V., Ramankutty, N. & Foley, J. A. 2012 Comparing the yields of organic and conventional agriculture. *Nature*, **485**(7397), 229–232.
- [2] de Ponti, T., Rijk, B. & van Ittersum, M. 2012 The crop yield gap between organic and conventional agriculture. *Agricultural Systems*, **108**, 1–9.
- [3] Hedges, L. V. & Olkin, I. 1985 *Statistical methods for meta-analysis*. New York: Academic Press.
- [4] Lajeunesse, M. J. 2011 On the meta-analysis of response ratios for studies with correlated and multi-group designs. *Ecology*, **92**(11), 2049–2055.
- [5] Gleser, L. J. & Olkin, I. 1994 Stochastically dependent effect sizes. In *The handbook of research synthesis* (eds. H. Cooper & L. V. Hedges), pp. 339–355. New York: Russell Sage Foundation.
- [6] Gurevitch, J. & Hedges, L. V. 1999 Statistical issues in ecological meta-analyses. *Ecology*, **80**(4), 1142–1149.
- [7] Viechtbauer, W. 2010 Conducting meta-analyses in r with the metafor package. *Journal of Statistical Software*, **36**(3), 1–48.
- [8] Plummer, M. 2013 *rjags: Bayesian graphical models using MCMC*. R package version 3–10.
- [9] Plummer, M. 2003 Jags: A program for analysis of bayesian graphical models using gibbs sampling.
- [10] Hedges, L., Gurevitch, J. & Curtis, P. 1999 The meta-analysis of response ratios in experimental ecology. *Ecology*, **80**, 1150–1156.

- 257 [11] Hedges, L. & Vevea, J. 1998 Fixed- and random-effects models in meta-analysis.  
258 *Psychological Methods*, **3**(4), 486–504.
- 259 [12] Gelman, A. & Hill, J. 2006 *Data analysis using regression and multilevel/hierarchical*  
260 *models*. Cambridge University Press.
- 261 [13] Kéry, M. & Schaub, M. 2012 *Bayesian population analysis using WinBUGS: a hierarchi-*  
262 *cal perspective*. Academic Press.
- 263 [14] Gurevitch, J. & Hedges, L. 2001 Meta-analysis. combining the results of indepen-  
264 dent experiments. In *Design and analysis of ecological experiments* (eds. S. M. Scheiner  
265 & J. Gurevitch), pp. 347–369. New York: Oxford University Press.
- 266 [15] Vanloqueren, G. & Baret, P. V. 2009 How agricultural research systems shape a tech-  
267 nological regime that develops genetic engineering but locks out agroecological in-  
268 novations. *Research policy*, **38**(6), 971–983.
- 269 [16] McIntyre, B. D. 2009 *IAASTD International Assessment of Agricultural Knowledge, Sci-*  
270 *ence and Technology for Development: Global Report*. Island Press.
- 271 [17] Carlisle, L. & Miles, A. 2013 Closing the knowledge gap: How the usda could tap  
272 the potential of biologically diversified farming systems. *Journal of Agriculture, Food*  
273 *Systems, and Community Development*, **3**(4), 219–225.
- 274 [18] Rothstein, H. R., Sutton, A. J. & Borenstein, M. 2006 *Publication bias in meta-analysis:*  
275 *Prevention, assessment and adjustments*. John Wiley & Sons.
- 276 [19] Johnson, J. B. & Omland, K. S. 2004 Model selection in ecology and evolution. *Trends*  
277 *in Ecology & Evolution*, **19**(2), 101–108.

- 278 [20] Badgley, C., Moghtader, J., Quintero, E., Zakem, E., Chappell, M. J., Aviles-Vazquez,  
279 K., Samulon, A. & Perfecto, I. 2007 Organic agriculture and the global food supply.  
280 *Renewable agriculture and food systems*, **22**(2), 86–108.
- 281 [21] Amarante, C. V. T. d., Steffens, C. A., Mafra, Á. L. & Albuquerque, J. A. 2008  
282 Yield and fruit quality of apple from conventional and organic production systems.  
283 *Pesquisa Agropecuária Brasileira*, **43**(3), 333–340.
- 284 [22] Appireddy, G. K., Saha, S., Mina, B. L., Kundu, S., Selvakumar, G. & Gupta, H. S.  
285 2008 Effect of organic manures and integrated nutrient management on yield po-  
286 tential of bell pepper (*Capsicum annuum*) varieties and on soil properties. *Archives*  
287 *of Agronomy and Soil Science*, **54**(2), 127–137.
- 288 [23] Archer, D. W., Jaradat, A. A., Johnson, J. M., Weyers, S. L., Gesch, R. W., Forcella,  
289 F. & Kludze, H. K. 2007 Crop productivity and economics during the transition to  
290 alternative cropping systems. *Agronomy journal*, **99**(6), 1538–1547.
- 291 [24] Arncken, C. M., Mäder, P., Mayer, J. & Weibel, F. P. 2012 Sensory, yield and quality  
292 differences between organically and conventionally grown winter wheat. *Journal of*  
293 *the Science of Food and Agriculture*, **92**(14), 2819–2825.
- 294 [25] Ban, D., Oplanić, M., Ilak Peršurić, A. S., Novak, B., Žutić, I., Borošić, J. &  
295 Žnidarčič, D. 2007 Crop management systems and endomycorrhiza effects on en-  
296 dive (*Cichorium endivia* L.) growth. *Acta agriculturae Slovenica*, **89**(1), 35–43.
- 297 [26] Behera, B., Sankar, G. M., Sharma, K., Mishra, A., Mohanty, S., Mishra, P., Rath, B. &  
298 Grace, J. K. 2012 Effects of fertilizers on yield, sustainability, and soil fertility under  
299 rainfed pigeon pea + rice system in subhumid oxisol soils. *Communications in Soil*  
300 *Science and Plant Analysis*, **43**(17), 2228–2246.

- 301 [27] Bertschinger, L., Mouron, P., Dolega, E., Höhn, H., Holliger, E., Husistein, A.,  
302 Schmid, A., Siegfried, W., Widmer, A. *et al.* 2004 Ecological apple production: a  
303 comparison of organic and integrated apple-growing. In *Acta Horticulturae 638*,  
304 *XXVI International Horticultural Congress: Sustainability of Horticultural Systems in*  
305 *the 21st Century, Toronto, Canada*, pp. 321–332. International Society for Horticul-  
306 tural Science.
- 307 [28] Besson, J., Oberson, A., Michel, V. & Niggli, U. 1992 Dok-versuch: ver-  
308 gleichende langzeituntersuchungen in den drei anbausystemen biologisch-  
309 dynamisch, organisch-biologisch und konventionell. ii. ertrag der kulturen: Gerste,  
310 1. und 2. fruchtfolgeperiode. *Schweiz. Landw. Fo.*, **32**, 3–32.
- 311 [29] Besson, J., Michel, V., Spiess, E. & Niggli, U. 1993 Dok-versuch: ver-  
312 gleichende langzeit-untersuchungen in den drei anbausystemen biologisch-  
313 dynamisch, organisch-biologisch und konventionell. iv. aufwand und ertrag:  
314 Naehrstoffbilanzen, 1. und 2. fruchtfolgeperiode. *Schweiz. Landw. Fo.*, **32**, 199–218.
- 315 [30] Besson, J., Meyre, S., Spiess, E., Stauffer, W. & Niggli, U. 1993 Dok-versuch: ver-  
316 gleichende langzeituntersuchungen in den drei anbausystemen biologisch- dy-  
317 namisch, organisch-biologisch und konventionell. ii. ertrag der kulturen: Randen,  
318 2. fruchtfolgeperiode. *Schweiz. Landw. Fo.*, **32**, 449–463.
- 319 [31] Bettiol, W., Ghini, R., Galvão, J. A. H. & Siloto, R. C. 2004 Organic and conventional  
320 tomato cropping systems. *Scientia Agricola*, **61**(3), 253–259.
- 321 [32] Bicanová, E., Capouchová, I., Krejčová, L., Petr, J. & Erhartová, D. 2006 The effect  
322 of growth structure on organic winter wheat quality. *Zemdirbyste. Mokslo Darbai*, **93**,  
323 297–305.



- 324 [33] Blaise, D. 2006 Yield, boll distribution and fibre quality of hybrid cotton (*Gossypium*  
325 *hirsutum* L.) as influenced by organic and modern methods of cultivation. *Journal of*  
326 *Agronomy and Crop Science*, **192**(4), 248–256.
- 327 [34] Campanelli, G. & Canali, S. 2012 Crop production and environmental effects in con-  
328 ventional and organic vegetable farming systems: The case of a long-term experi-  
329 ment in mediterranean conditions (Central Italy). *Journal of Sustainable Agriculture*,  
330 **36**(6), 599–619.
- 331 [35] Cavigelli, M. A., Hima, B. L., Hanson, J. C., Teasdale, J. R., Conklin, A. E. & Lu, Y.-c.  
332 2009 Long-term economic performance of organic and conventional field crops in  
333 the mid-Atlantic region. *Renewable agriculture and food systems*, **24**(2), 102–119.
- 334 [36] Citak, S. & Sonmez, S. 2010 Effects of conventional and organic fertilization on  
335 spinach (*Spinacea oleracea*, L.) growth, yield, vitamin C and nitrate concentration  
336 during two successive seasons. *Scientia Horticulturae*, **126**(4), 415–420.
- 337 [37] Clark, S., Klonsky, K., Livingston, P. & Temple, S. 1999 Crop-yield and economic  
338 comparisons of organic, low-input, and conventional farming systems in Califor-  
339 nia’s Sacramento Valley. *American Journal of Alternative Agriculture*, **14**(3), 109–121.
- 340 [38] Coulter, J. A., Sheaffer, C. C., Wyse, D. L., Haar, M. J., Porter, P. M., Quiring, S. R. &  
341 Klossner, L. D. 2011 Agronomic performance of cropping systems with contrasting  
342 crop rotations and external inputs. *Agronomy Journal*, **103**(1), 182–192.
- 343 [39] Cürük, S., Sermenli, T., Mavi, K. & Evrendilek, F. 2004 Yield and fruit quality of  
344 watermelon (*Citrullus lanatus* (thumb.) Matsum. & Nakai.) and melon (*Cucumis melo*,  
345 L.) under protected organic and conventional farming systems in a Mediterranean  
346 region of Turkey. *Biological agriculture & horticulture*, **22**(2), 173–183.

- 347 [40] De Luca, S., Fagnano, M. & Quaglietta Chiarandà, F. 2004 The effect of organic fertil-  
348 ization on yields of tomato crops in the Sele River Plain. In *International Symposium*  
349 *Towards Ecologically Sound Fertilisation Strategies for Field Vegetable Production* (eds.  
350 F. Tei, P. Benincasa & M. Guiducci), vol. 700, pp. 103–106.
- 351 [41] Delate, K. & Cambardella, C. A. 2004 Agroecosystem performance during transition  
352 to certified organic grain production. *Agronomy Journal*, **96**(5), 1288–1298.
- 353 [42] Delate, K., Duffy, M., Chase, C., Holste, A., Friedrich, H. & Wantate, N. 2003 An  
354 economic comparison of organic and conventional grain crops in a long-term agro-  
355 ecological research (LTAR) site in Iowa. *American Journal of Alternative Agriculture*,  
356 **18**(2), 59–69.
- 357 [43] Delmotte, S., Tiftonell, P., Mouret, J.-C., Hammond, R. & Lopez-Ridaura, S. 2011  
358 On farm assessment of rice yield variability and productivity gaps between organic  
359 and conventional cropping systems under mediterranean climate. *European Journal*  
360 *of Agronomy*, **35**(4), 223–236.
- 361 [44] Demiryurek, K. & Ceyhan, V. 2009 Economics of organic and conventional hazelnut  
362 production in the Terme district of Samsun, Turkey. In *VII International Congress on*  
363 *Hazelnut, Viterbo, Italy, 23-27 June 2008* (eds. L. Varvaro & S. Franco), 845, pp. 739–  
364 744. International Society for Horticultural Science (ISHS).
- 365 [45] Denison, R. F., Bryant, D. C. & Kearney, T. E. 2004 Crop yields over the first nine  
366 years of LTRAS, a long-term comparison of field crop systems in a Mediterranean  
367 climate. *Field Crops Research*, **86**(2), 267–277.
- 368 [46] Dobbs, T. L. & Smolik, J. D. 1997 Productivity and profitability of conventional and  
369 alternative farming systems: A long-term on-farm paired comparison. *Journal of*  
370 *Sustainable Agriculture*, **9**(1), 63–79.

- 371 [47] Doltra, J., Lægdsmand, M. & Olesen, J. E. 2011 Cereal yield and quality as affected  
372 by nitrogen availability in organic and conventional arable crop rotations: A com-  
373 bined modeling and experimental approach. *European Journal of Agronomy*, **34**(2),  
374 83–95.
- 375 [48] Drinkwater, L., Letourneau, D., Workneh, F., Van Bruggen, A. & Shennan, C. 1995  
376 Fundamental differences between conventional and organic tomato agroecosys-  
377 tems in California. *Ecological Applications*, pp. 1098–1112.
- 378 [49] Drinkwater, L., Janke, R. & Rossoni-Longnecker, L. 2000 Effects of tillage intensity  
379 on nitrogen dynamics and productivity in legume-based grain systems. *Plant and*  
380 *Soil*, **227**(1-2), 99–113.
- 381 [50] Eckhoff, J., Bergman, J. & Flynn, C. 2005 A comparison of safflower (*Carthamus tinc-*  
382 *torius L.*) grown under conventional and chemical-free conditions. In *Proceedings*  
383 *of the VIth International Safflower Conference, Istanbul-Turkey, 6-10 June, 2005. SAF-*  
384 *FLOWER: a unique crop for oil spices and health consequently, a better life for you.* (eds.  
385 E. Esendal, J. Bergman, N. Kandemir, R. Johnson & A. Corleto), pp. 3–1. Engin  
386 Maatbacilik Ltd. Şti.
- 387 [51] Efthimiadou, A., Bilalis, D., Karkanis, A., Froud-Williams, B. & Eleftherochorinos, I.  
388 2009 Effects of cultural system (organic and conventional) on growth, photosynthe-  
389 sis and yield components of sweet corn (*Zea mays L.*) under semi-arid environment.  
390 *Notulae Botanicae Horti Agrobotanici Cluj-Napoca*, **37**(2), 104–111.
- 391 [52] Entz, M., Hoepfner, J., Wilson, L., Tenuta, M., Bamford, K. & Holliday, N. 2005  
392 Influence of organic management with different crop rotations on selected produc-  
393 tivity parameters in a long-term Canadian field study. In *Researching Sustainable*  
394 *Systems, Proceedings of the International Scientific Conference on Organic Agriculture.*

- 395 [53] Eyhorn, F., Ramakrishnan, M. & Mäder, P. 2007 The viability of cotton-based or-  
396 ganic farming systems in India. *International Journal of Agricultural Sustainability*,  
397 5(1), 25–38.
- 398 [54] Gelfand, I., Snapp, S. S. & Robertson, G. P. 2010 Energy efficiency of conventional,  
399 organic, and alternative cropping systems for food and fuel at a site in the US Mid-  
400 west. *Environmental science & technology*, 44(10), 4006–4011.
- 401 [55] Gerdgikova, M., Videva, M. & Pavlov, D. 2012 Content and yield of crude pro-  
402 tein from winter pea grain, cultivated after different predecessors in conditions of  
403 organic and conventional production. *Agricultural Science and Technology*, 4(4), 378–  
404 381.
- 405 [56] Gliessman, S., Werner, M., Swezey, S., Caswell, E., Cochran, J. & Rosado-May, F.  
406 1996 Conversion to organic strawberry management changes ecological processes.  
407 *California Agriculture*, 50(1), 24–31.
- 408 [57] Goldstein, W., Barber, W., Carpenter-Boggs, L., Daloren, D. & Koopmans, C. 2004  
409 Comparisons of conventional, organic and biodynamic methods. *Michael Fields*  
410 *Agricultural Institute*.
- 411 [58] Gopinath, K., Saha, S., Mina, B., Pande, H., Kundu, S. & Gupta, H. 2008 Influence of  
412 organic amendments on growth, yield and quality of wheat and on soil properties  
413 during transition to organic production. *Nutrient cycling in agroecosystems*, 82(1),  
414 51–60.
- 415 [59] Gosavi, A., Potdar, D., Sonawane, P., Shirpurkar, G. & Rasal, P. 2009 Organic farm-  
416 ing in soybean-wheat cropping sequence. *Agricultural Science Digest*, 29(4), 267–270.
- 417 [60] Greer, G., Kaye-Blake, W., Zellman, E. & Parsonson-Ensor, C. 2008 Comparison of

- 418 the financial performance of organic and conventional farms. *Journal of Organic*  
419 *Systems*, 3(2), 18–28.
- 420 [61] Gündoğmuş, E. 2006 A comparative analysis of organic and conventional dried  
421 apricot production on small households in Turkey. *Asian Journal of Plant Sciences*,  
422 5(1), 98–104.
- 423 [62] Gündoğmuş, E. 2007 Organic dried fig production: A comparative analysis of or-  
424 ganic and conventional smallholdings in Turkey. *Biological Agriculture & Horticul-*  
425 *ture*, 24(4), 379–396.
- 426 [63] Gündoğmuş, E. & Bayramoglu, Z. 2005 Organic raisin production: a comparative  
427 analysis of organic and conventional smallholdings in Turkey. *Journal of Agronomy*,  
428 4.
- 429 [64] Hargreaves, J. C., Adl, M., Warman, P. R. & Rupasinghe, H. 2008 The effects of  
430 organic and conventional nutrient amendments on strawberry cultivation: Fruit  
431 yield and quality. *Journal of the Science of Food and Agriculture*, 88(15), 2669–2675.
- 432 [65] Helmers, G. A., Langemeier, M. R. & Atwood, J. 1986 An economic analysis of alter-  
433 native cropping systems for east-central Nebraska. *American Journal of Alternative*  
434 *Agriculture*, 1(4), 153–158.
- 435 [66] Herencia, J. F., Ruiz-Porras, J., Melero, S., Garcia-Galavis, P., Morillo, E. & Maqueda,  
436 C. 2007 Comparison between organic and mineral fertilization for soil fertility lev-  
437 els, crop macronutrient concentrations, and yield. *Agronomy Journal*, 99(4), 973–983.
- 438 [67] Institute for Biodynamic Research (IBDF) 1988-1991 growth and yield of winter rye.
- 439 [68] Igbokwe, P. E., Huam, L. C., Chukwuma, F. O. & Huam, J. 2006 Sweetpotato yield

- 440 and quality as influenced by cropping systems. *Journal of vegetable science*, **11**(4),  
441 35–46.
- 442 [69] Ingver, A., Tamm, I. & Tamm, Ü. 2008 Effect of organic and conventional production  
443 on yield and the quality of spring cereals. *Agronomijas Vēstis*, **11**, 61–67.
- 444 [70] Järvan, M. & Edesi, L. 2009 The effect of cultivation methods on the yield and bio-  
445 logical quality of potato. *Agronomy Research*, **7**, 289–299.
- 446 [71] Jimenez, M., Van der Veken, L., Neiryneck, H., Rodríguez, H., Ruiz, O. & Swennen,  
447 R. 2007 Organic banana production in Ecuador: Its implications on black Sigatoka  
448 development and plant–soil nutritional status. *Renewable Agriculture and Food Sys-  
449 tems*, **22**(04), 297–306.
- 450 [72] Juroszek, P., Ledesma, D., Ma, C., Yang, R., Lumpkin, H., Lin, C., Tsai, H., Wu,  
451 D., Hanson, P. *et al.* 2008 Plant vigour and yields of organically and conventionally  
452 grown tomato crops in Taiwan. *Acta horticulturae*, **767**, 257–265.
- 453 [73] Kalinova, J. & Vrchotova, N. 2011 The influence of organic and conventional crop  
454 management, variety and year on the yield and flavonoid level in common buck-  
455 wheat groats. *Food chemistry*, **127**(2), 602–608.
- 456 [74] Kaut, A., Mason, H., Navabi, A., O'donovan, J. & Spaner, D. 2009 Performance and  
457 stability of performance of spring wheat variety mixtures in organic and conven-  
458 tional management systems in western Canada. *The Journal of Agricultural Science*,  
459 **147**(02), 141–153.
- 460 [75] Kirchmann, H., Bergström, L., Kätterer, T., Mattsson, L. & Gesslein, S. 2007 Compar-  
461 ison of long-term organic and conventional crop–livestock systems on a previously  
462 nutrient-depleted soil in Sweden. *Agronomy Journal*, **99**(4), 960–972.

- 463 [76] Kitchen, J. L., McDonald, G. K., Shepherd, K. W., Lorimer, M. F. & Graham, R. D.  
464 2003 Comparing wheat grown in South Australian organic and conventional farm-  
465 ing systems. 1. growth and grain yield. *Crop and Pasture Science*, **54**(9), 889–901.
- 466 [77] Klepper, R., Lockeretz, W., Commoner, B., Gertler, M., Fast, S., O’Leary, D. &  
467 Blobaum, R. 1977 Economic performance and energy intensiveness on organic and  
468 conventional farms in the Corn Belt: a preliminary comparison. *American Journal of*  
469 *Agricultural Economics*, **59**(1), 1–12.
- 470 [78] Knudsen, M. T., Yu-Hui, Q., Yan, L. & Halberg, N. 2010 Environmental assessment  
471 of organic soybean (*Glycine max.*) imported from China to Denmark: a case study.  
472 *Journal of Cleaner Production*, **18**(14), 1431–1439.
- 473 [79] Koocheki, A., Jahan, M. & Nassiri Mahallati, M. 2008 Effects of arbuscular myc-  
474 orrhizal fungi and free-living nitrogen-fixing bacteria on growth characteristics of  
475 corn (*Zea mays L.*) under organic and conventional cropping systems.
- 476 [80] Korsaeht, A. 2012 N, P, and K budgets and changes in selected topsoil nutrients over  
477 10 years in a long-term experiment with conventional and organic crop rotations.  
478 *Applied and Environmental Soil Science*, **2012**.
- 479 [81] Liebhardt, W., Andrews, R., Culik, M., Harwood, R., Janke, R., Radke, J. & Reiger-  
480 Schwartz, S. 1989 Crop production during conversion from conventional to low-  
481 input methods. *Agronomy Journal*, **81**(2), 150–159.
- 482 [82] Lo Scalzo, R., Iannocari, T., Genna, A., Di Cesare, L., Viscardi, D., Ferrari, V. &  
483 Campanelli, G. 2008 Organic vs. conventional field trials: the effect on cauliflower  
484 quality. In *Cultivating the Future Based on Science: 2nd Conference of the International*  
485 *Society of Organic Agriculture Research ISO FAR, Modena, Italy, June 18-20, 2008*.

- 486 [83] Lockeretz, W., Shearer, G., Sweeney, S., Kuepper, G., Wanner, D. & Kohl, D. H.  
487 1980 Maize yields and soil nutrient levels with and without pesticides and standard  
488 commercial fertilizers. *Agronomy Journal*, **72**(1), 65–72.
- 489 [84] Lotter, D., Seidel, R. & Liebhardt, W. 2003 The performance of organic and conven-  
490 tional cropping systems in an extreme climate year. *American Journal of Alternative*  
491 *Agriculture*, **18**(3), 146–154.
- 492 [85] Long Term Research on Agricultural Systems (LTRAS). Russell Ranch Sustainable  
493 Agriculture Facility.
- 494 [86] Lyngbaek, A., Muschler, R. & Sinclair, F. 2001 Productivity and profitability of mul-  
495 tistrata organic versus conventional coffee farms in Costa Rica. *Agroforestry Systems*,  
496 **53**(2), 205–213.
- 497 [87] Macit, I., Koc, A., Guler, S. & Deligoz, I. 2007 Yield, quality and nutritional status of  
498 organically and conventionally-grown strawberry cultivars. *Asian Journal of Plant*  
499 *Sciences*, **6**(7), 1131–1136.
- 500 [88] Mäder, P., Fließbach, A., Dubois, D., Gunst, L., Fried, P. & Niggli, U. 2002 Soil  
501 fertility and biodiversity in organic farming. *Science*, **296**(5573), 1694–1697.
- 502 [89] Maggio, A., Carillo, P., Bulmetti, G. S., Fuggi, A., Barbieri, G. & De Pascale, S. 2008  
503 Potato yield and metabolic profiling under conventional and organic farming. *Eu-*  
504 *ropean Journal of Agronomy*, **28**(3), 343–350.
- 505 [90] Mahoney, P. R., Olson, K. D., Porter, P. M., Huggins, D. R., Perillo, C. A. & Crook-  
506 ston, R. K. 2007 Profitability of organic cropping systems in southwestern Min-  
507 nesota. In *Organic Food*, pp. 65–81. Springer.



- 508 [91] Malusà, E., Laurenti, E., Ghibaudi, E. & Rolle, L. 2002 Influence of organic and  
509 conventional management on yield and composition of grape cv.'Grignolino'. In  
510 *XXVI International Horticultural Congress: Viticulture-Living with Limitations 640*, pp.  
511 135–141.
- 512 [92] Martínez-Sánchez, J. C. 2008 The role of organic production in biodiversity conser-  
513 vation in shade coffee plantations. Ph.D. thesis, University of Washington.
- 514 [93] Martini, E. A., Buyer, J. S., Bryant, D. C., Hartz, T. K. & Denison, R. F. 2004 Yield  
515 increases during the organic transition: improving soil quality or increasing expe-  
516 rience? *Field Crops Research*, **86**(2), 255–266.
- 517 [94] Mazzoncini, M., Barberi, P., Belloni, P., Cerrai, D. & Antichi, D. 2006 Sunflower un-  
518 der conventional and organic farming systems: results from a long term experiment  
519 in Central Italy. *Aspects of Applied Biology 79, What will organic farming deliver? COR*  
520 *2006*, pp. 125–129.
- 521 [95] Mazzoncini, M., Belloni, P., Risaliti, R. & Antichi, D. 2007 Organic vs conventional  
522 winter wheat quality and organoleptic bread test. In *Improving Sustainability in Or-*  
523 *ganic and Low Input Food Production Systems, University of Hohenheim, Germany*.
- 524 [96] Mourão, I., Brito, L. M. & Coutinho, J. 2008 Yield and quality of organic versus  
525 conventional potato crop.
- 526 [97] Oplanić, M., Ban, D., Ilak Peršurić, A. S. & Žnidarčič, D. 2009 Profitability of leek  
527 (*Allium porrum* L.) in three production systems. *International journal of food, agricul-*  
528 *ture and environment*, **7**(3-4), 376–381.
- 529 [98] Peck, G. M., Andrews, P. K., Reganold, J. P. & Fellman, J. K. 2006 Apple orchard  
530 productivity and fruit quality under organic, conventional, and integrated man-  
531 agement. *HortScience*, **41**(1), 99–107.

- 532 [99] Peck, G. M., Merwin, I. A., Brown, M. G. & Agnello, A. M. 2010 Integrated and  
533 organic fruit production systems for Liberty apple in the Northeast United States:  
534 a systems-based evaluation. *HortScience*, **45**(7), 1038–1048.
- 535 [100] Pezzarossa, B., Barbafieri, M., Benetti, A., Petruzzelli, G., Mazzoncini, M., Bonari,  
536 E. & Pagliai, M. 1995 Effects of conventional and alternative management systems  
537 on soil phosphorus content, soil structure, and corn yield. *Communications in Soil  
538 Science & Plant Analysis*, **26**(17-18), 2869–2885.
- 539 [101] Pieper, J. R. & Barrett, D. M. 2009 Effects of organic and conventional production  
540 systems on quality and nutritional parameters of processing tomatoes. *Journal of the  
541 Science of Food and Agriculture*, **89**(2), 177–194.
- 542 [102] Polat, E., Demir, H. & Onus, A. 2008 Comparison of some yield and quality criteria  
543 in organically and conventionally-grown lettuce. *African Journal of Biotechnology*,  
544 **7**(9), 1235–1239.
- 545 [103] Polat, E., Demir, H. & Erler, F. 2010 Yield and quality criteria in organically and  
546 conventionally grown tomatoes in Turkey. *Scientia Agrícola*, **67**(4), 424–429.
- 547 [104] Porter, P. M., Huggins, D. R., Perillo, C. A., Quiring, S. R. & Crookston, R. K. 2003  
548 Organic and other management strategies with two-and four-year crop rotations in  
549 Minnesota. *Agronomy Journal*, **95**(2), 233–244.
- 550 [105] Posner, J., Baldock, J. & Hedtcke, J. 2005 The Wisconsin integrated cropping systems  
551 trials: yields, yield variability, and yield trends 1990-2002. *The Wisconsin Integrated  
552 Cropping Systems Trial Tenth Report-2003 & 2004*, p. 66.
- 553 [106] Rader, J. S., Walser, R. H., Williams, C. F. & Davis, T. D. 1985 Organic and conven-  
554 tional peach production and economics. *Biological Agriculture & Horticulture*, **2**(3),  
555 215–222.

- 556 [107] Raupp, D. 1996 Quality of plant products grown with manure fertilization. pp.  
557 13–33. Institute for Biodynamic Research Darmstadt, Germany.
- 558 [108] Raupp, J. 1999 Entwicklung des kornertrages und der ertragskomponenten von  
559 winterroggen in einem langzeit-düngungsversuch. *Merbach, W*, pp. 237–240.
- 560 [109] Reganold, J. P., Elliott, L. F. & Unger, Y. L. 1987 Long-term effects of organic and  
561 conventional farming on soil erosion. *Nature*, **330**(6146), 370–372.
- 562 [110] Reganold, J. P., Glover, J. D., Andrews, P. K. & Hinman, H. R. 2001 Sustainability of  
563 three apple production systems. *Nature*, **410**(6831), 926–930.
- 564 [111] Riahi, A., Hdider, C., Sanaa, M., Tarchoun, N., Ben Kheder, M. & Guezal, I. 2009  
565 Effect of conventional and organic production systems on the yield and quality of  
566 field tomato cultivars grown in tunisia. *Journal of the Science of Food and Agriculture*,  
567 **89**(13), 2275–2282.
- 568 [112] Russo, V. & Taylor, M. 2006 Soil amendments in transition to organic vegetable  
569 production with comparison to conventional methods: Yields and economics.  
570 *HortScience*, **41**(7), 1576–1583.
- 571 [113] Ryan, M. H., Derrick, J. & Dann, P. 2004 Grain mineral concentrations and yield of  
572 wheat grown under organic and conventional management. *Journal of the Science of*  
573 *Food and Agriculture*, **84**(3), 207–216.
- 574 [114] Ryan, M., Smith, R., Mortensen, D., Teasdale, J., Curran, W., Seidel, R. & Shumway,  
575 D. 2009 Weed–crop competition relationships differ between organic and conven-  
576 tional cropping systems. *Weed Research*, **49**(6), 572–580.
- 577 [115] Sellen, D., Tolman, J. H., McLeod, D. G. R., Weersink, A. & Yiridoe, E. K. 1996 A

- 578 comparison of financial returns during early transition from conventional to or-  
579 ganic vegetable production. *Journal of Vegetable Crop Production*, **1**(2), 11–39.
- 580 [116] Skrabule, I. 2008 Comparison of potato clones developed and tested in organic and  
581 conventional growing conditions. *Agronomijas vēstis*, **11**, 147–154.
- 582 [117] Song, S., Lehne, P., Le, J., Ge, T. & Huang, D. 2009 Yield, fruit quality and nitrogen  
583 uptake of organically and conventionally grown muskmelon with different inputs  
584 of nitrogen, phosphorus, and potassium. *Journal of Plant Nutrition*, **33**(1), 130–141.
- 585 [118] Stonehouse, D. P., Weise, S., Sheardown, T., Gill, R. & Swanton, C. 1996 A case  
586 study approach to comparing weed management strategies under alternative farm-  
587 ing systems in Ontario. *Canadian Journal of Agricultural Economics/Revue canadienne*  
588 *d'agroeconomie*, **44**(1), 81–99.
- 589 [119] Suja, G., Sundaresan, S., John, K. S., Sreekumar, J. & Misra, R. S. 2012 Higher yield,  
590 profit and soil quality from organic farming of elephant foot yam. *Agronomy for*  
591 *sustainable development*, **32**(3), 755–764.
- 592 [120] Swezey, S., Rider, J., Werner, M., Buchanan, M., Allison, J. & Gliessman, S. 1994  
593 In Santa Cruz County, Granny Smith conversions to organic show early success.  
594 *California Agriculture*, **48**(6), 36–44.
- 595 [121] Swezey, S. L., Goldman, P., Bryer, J. & Nieto, D. 2007 Six-year comparison be-  
596 tween organic, IPM and conventional cotton production systems in the Northern  
597 San Joaquin Valley, California. *Renewable Agriculture and Food Systems*, **22**(1), 30–40.
- 598 [122] Szafirowska, A. & Elkner, K. 2008 Yielding and fruit quality of three sweet pep-  
599 per cultivars from organic and conventional cultivation. *Vegetable Crops Research*  
600 *Bulletin*, **69**(1), 135–143.

- 601 [123] Tamm, I., Tamm, Ü. & Ingver, A. 2009 Spring cereals performance in organic and  
602 conventional cultivation. *Agronomy Research*, **7**, 522–527.
- 603 [124] Teasdale, J. R., Coffman, C. B. & Mangum, R. W. 2007 Potential long-term benefits  
604 of no-tillage and organic cropping systems for grain production and soil improve-  
605 ment. *Agronomy Journal*, **99**(5), 1297–1305.
- 606 [125] Temple, S. R., Friedman, D. B., Somasco, O., Ferris, H., Scow, K. & Klonsky, K. 1994  
607 An interdisciplinary, experiment station-based participatory comparison of alterna-  
608 tive crop management systems for California's Sacramento Valley. *American Journal*  
609 *of Alternative Agriculture*, **9**, 64–64.
- 610 [126] Thorup-Kristensen, K., Dresbøll, D. B. & Kristensen, H. L. 2012 Crop yield, root  
611 growth, and nutrient dynamics in a conventional and three organic cropping sys-  
612 tems with different levels of external inputs and n re-cycling through fertility build-  
613 ing crops. *European Journal of Agronomy*, **37**(1), 66–82.
- 614 [127] Torstensson, G., Aronsson, H. & Bergström, L. 2006 Nutrient use efficiencies and  
615 leaching of organic and conventional cropping systems in Sweden. *Agronomy Jour-*  
616 *nal*, **98**(3), 603–615.
- 617 [128] Treadwell, D. D., Creamer, N. G., Hoyt, G. D. & Schultheis, J. R. 2008 Nutrient  
618 management with cover crops and compost affects development and yield in or-  
619 ganically managed sweetpotato systems. *HortScience*, **43**(5), 1423–1433.
- 620 [129] Valkila, J. 2009 Fair trade organic coffee production in Nicaragua: Sustainable de-  
621 velopment or a poverty trap? *Ecological Economics*, **68**(12), 3018–3025.
- 622 [130] Wang, G., Ngouajio, M., McGiffen, M. E. & Hutchinson, C. M. 2008 Summer cover  
623 crop and in-season management system affect growth and yield of lettuce and can-  
624 taloupe. *HortScience*, **43**(5), 1398–1403.

- 625 [131] Warman, P. R. & Havard, K. 1997 Yield, vitamin and mineral contents of organically  
626 and conventionally grown carrots and cabbage. *Agriculture, ecosystems & environ-*  
627 *ment*, **61**(2), 155–162.
- 628 [132] Warman, P. R. & Havard, K. 1998 Yield, vitamin and mineral contents of organi-  
629 cally and conventionally grown potatoes and sweet corn. *Agriculture, ecosystems &*  
630 *environment*, **68**(3), 207–216.
- 631 [133] Welsh, C., Tenuta, M., Flaten, D., Thiessen-Martens, J. & Entz, M. 2009 High yield-  
632 ing organic crop management decreases plant-available but not recalcitrant soil  
633 phosphorus. *Agronomy Journal*, **101**(5), 1027–1035.
- 634 [134] Wheeler, S. A. & Crisp, P. 2011 Going organic in viticulture: a case-study compar-  
635 ison in Clare Valley, South Australia. *Australasian Journal of Environmental Manage-*  
636 *ment*, **18**(3), 182–198.
- 637 [135] Wisconsin Integrated Cropping Systems Trial (WICST) 2007 WICST annual crop  
638 yields.

**Table S1:** Parameter posteriors for models without explanatory variables.  $\mu$  is the true mean response ratio across years and studies,  $\sigma_\alpha$  is the standard deviation of the distribution from which the study random effects are drawn;  $\sigma_\eta$  is the standard deviation of the distribution from which the within year random effects are drawn;  $CV_{\sigma_\eta}$  is the coefficient of variation of the gamma from which the study-specific within-year variance are drawn; and  $\sigma_\beta$  is the standard deviation of the distribution of random between year effects. Values of Rhat  $<$  1.1 indicate convergence. Lower Deviance Information Criterion (DIC) indicates better model fit to the data.

| Parameter                                                                       | Posterior mean | Posterior standard deviation | 95% CI        | Rhat  |
|---------------------------------------------------------------------------------|----------------|------------------------------|---------------|-------|
| Study random effect, DIC=1684.8                                                 |                |                              |               |       |
| $\mu$                                                                           | 0.795          | 0.027                        | 0.742 – 0.848 | 1.001 |
| $\sigma_\alpha$                                                                 | 0.341          | 0.026                        | 0.294 – 0.396 | 1.001 |
| Study and within year random effects, DIC= -565.9                               |                |                              |               |       |
| $\mu$                                                                           | 0.788          | 0.021                        | 0.749 – 0.829 | 1.001 |
| $\sigma_\alpha$                                                                 | 0.188          | 0.024                        | 0.144 – 0.239 | 1.001 |
| $\sigma_\eta$                                                                   | 0.312          | 0.011                        | 0.291 – 0.333 | 1.001 |
| Study and study-specific within year random effects, DIC= -618.0                |                |                              |               |       |
| $\mu$                                                                           | 0.808          | 0.019                        | 0.771 – 0.845 | 1.001 |
| $\sigma_\alpha$                                                                 | 0.189          | 0.023                        | 0.145 – 0.237 | 1.001 |
| $CV_{\sigma_\eta}$                                                              | 1.155          | 0.135                        | 0.907 – 1.436 | 1.001 |
| Study, study-specific within year, and between year random effects, DIC= -621.2 |                |                              |               |       |
| $\mu$                                                                           | 0.808          | 0.019                        | 0.770 – 0.846 | 1.001 |
| $\sigma_\alpha$                                                                 | 0.186          | 0.024                        | 0.142 – 0.234 | 1.001 |
| $CV_{\sigma_\eta}$                                                              | 1.157          | 0.136                        | 0.907 – 1.440 | 1.001 |
| $\sigma_\beta$                                                                  | 0.041          | 0.027                        | 0.002 – 0.098 | 1.001 |

**Table S2:** Yield estimates compared with previous studies. Categories of explanatory variables are arranged from the smallest to the largest difference between organic and conventional yields. Bold categories indicate conventional yields are significantly larger than organic yields. Unbolded categories indicate organic and conventional yields are not significantly different. << between two categories indicates the two categories are significantly different from each other. \* includes both plant and animal products. \*\* de Ponti et al. [2] did not report significance. \*\*\* Confidence intervals were calculated from the standard deviation and the number of yield comparisons reported by de Ponti et al. [2].

| Variable     | Ponisio et al.                                                                                                     | Seufert et al. [1]                                                                | de Ponti et al. [2]                                                   | Badgley et al. [20]                      |
|--------------|--------------------------------------------------------------------------------------------------------------------|-----------------------------------------------------------------------------------|-----------------------------------------------------------------------|------------------------------------------|
| Overall      | 80.8% ± 3.7%                                                                                                       | 75% ± 4%                                                                          | 80% ± 1% * **                                                         | 132% ± 1%*                               |
| Development  | <b>developing</b><br><b>developed</b>                                                                              | <b>developed</b> <<<br><b>developing</b>                                          | developing **<br>developed                                            | <b>developing</b> <<<br><b>developed</b> |
| Crop type    | <b>fruits and nuts</b><br><b>oilseed crops</b><br><b>cereals</b><br><b>vegetables</b><br><b>roots &amp; tubers</b> | fruits and nuts<br><b>oilseed crops</b> <<<br><b>cereals</b><br><b>vegetables</b> | vegetables **<br>cereals<br>roots & tubers<br>oilseed crops<br>fruits | NA                                       |
| Crop species | apple<br>oat<br>tomato<br><b>soybean</b><br><b>maize</b> <<<br><b>wheat</b><br><b>barley</b><br><b>potato</b>      | <b>soybean</b><br><b>maize</b><br><b>tomato</b><br><b>barley</b><br><b>wheat</b>  | soybean **<br>maize<br>oat<br>tomato<br>wheat<br>barley<br>apple      | NA                                       |
| Legume       | <b>legume</b><br><b>non-legume</b>                                                                                 | legume <<<br><b>non-legume</b>                                                    | NA                                                                    | NA                                       |
| Plant-type   | <b>perennial</b><br><b>annual</b>                                                                                  | perennial <<<br><b>annual</b>                                                     | NA                                                                    | NA                                       |



**Table S3:** The impact of management practices on the yield gap compared with previous studies. Categories of explanatory variables are arranged from the smallest to the largest difference between organic and conventional yields. Bold categories indicate conventional yields are significantly larger than organic yields. Unbolded categories indicate organic and conventional yields are not significantly different. << between two categories indicates the two categories are significantly different from each other.

| <b>Variable</b>           | <b>Ponisio et al.</b>                                          | <b>Seufert et al. [1]</b>                                             |
|---------------------------|----------------------------------------------------------------|-----------------------------------------------------------------------|
| Nitrogen input            | similar N input <<<br>more N organic <<<br>more N conventional | more organic <<<br>more conventional<br>similar N input               |
| Poly/monoculture          | organic polyculture <<<br>both monoculture<br>both polyculture | organic polyculture<br>both monocultures<br>both polyculture          |
| Rotations                 | more organic <<<br>similar<br>no rotations                     | more organic<br>similar <<<br>no rotations                            |
| Organic fertilizer type   | organic fertilizer<br>animal<br>mix<br>plant                   | organic fertilizer<br>mix<br>animal<br>plant                          |
| Conventional system type  | low input <<<br>high input                                     | low input <<<br>high input                                            |
| Organic system type       | certified<br>transitional<br>biodynamic<br>organic standards   | certified<br>biodynamic <<<br>organic standards<br>transition         |
| Best management practices | no<br>yes                                                      | yes <<<br>no                                                          |
| Irrigation                | rain-fed<br>irrigated                                          | rain-fed <<<br>irrigated                                              |
| Soil pH                   | acidic<br>neutral <<<br>strongly acidic<br>strongly alkaline   | weak acidic to alkaline <<<br>strongly acidic <<<br>strongly alkaline |
| Time since conversion     | 0-3 years<br>> 7 years<br>4-7 years                            | > 7 years<br>4-7 years <<<br>0-3 years                                |

**Table S4:** The impact of study quality indicators on the yield gap compared with previous studies. Categories of explanatory variables are arranged from the smallest to the largest difference between organic and conventional yields. Bold categories indicated they are significantly less than one.  $\ll$  between two categories indicates the two categories are significantly different from each other.

| <b>Variable</b>         | <b>Ponisio et al.</b>                                     | <b>Seufert et al. [1]</b>                                  |
|-------------------------|-----------------------------------------------------------|------------------------------------------------------------|
| Duration of study       | > 10 seasons<br>3-5 season<br>6-10 seasons<br>1-2 seasons | > 10 seasons<br>6-10 seasons<br>3-5 seasons<br>1-2 seasons |
| Literature type         | journal<br>grey                                           | grey $\ll$<br>journal                                      |
| Comparability of system | comparable<br>not comparable                              | comparable<br>not comparable                               |
| Study type              | on-farm trial<br>experimental<br>survey                   | on-farm trial<br>survey<br>experimental                    |

**Table S5:** A list of the studies included in the meta-analysis including the crops with yield comparisons, the country the study was conducted in, whether the study was included in Badgley et al. [20], Seufert et al. [1] or de Ponti et al. [2], and the number of organic to conventional yield comparisons extracted from each study.

| Study | Crop                                    | Country        | Comparisons | In Badgley | In Seufert | In de Ponti |
|-------|-----------------------------------------|----------------|-------------|------------|------------|-------------|
| [21]  | apple                                   | Brazil         | 2           | no         | no         | yes         |
| [22]  | pepper                                  | India          | 5           | no         | yes        | no          |
| [23]  | spring<br>wheat,<br>maize, soy-<br>bean | United States  | 40          | no         | no         | yes         |
| [24]  | wheat                                   | Switzerland    | 2           | no         | no         | yes         |
| [25]  | endive                                  | Croatia        | 2           | no         | no         | yes         |
| [26]  | rice, pigeon<br>pea                     | India          | 2           | no         | no         | no          |
| [27]  | apple                                   | Switzerland    | 4           | no         | yes        | yes         |
| [28]  | barley                                  | Switzerland    | 4           | no         | yes        | no          |
| [29]  | cabbage                                 | Switzerland    | 4           | no         | yes        | no          |
| [30]  | sugar beet                              | Switzerland    | 4           | no         | yes        | no          |
| [31]  | tomato                                  | Brazil         | 2           | no         | no         | yes         |
| [32]  | wheat                                   | Czech Republic | 6           | no         | no         | yes         |
| [33]  | cotton                                  | India          | 1           | no         | yes        | no          |

|      |                                                                 |               |    |     |     |     |
|------|-----------------------------------------------------------------|---------------|----|-----|-----|-----|
| [34] | bean,<br>cauliflower,<br>fennel, let-<br>tuce, melon,<br>tomato | Italy         | 41 | no  | no  | no  |
| [35] | maize, soy-<br>bean, wheat                                      | United States | 32 | no  | yes | no  |
| [36] | spinach                                                         | Turkey        | 34 | no  | yes | no  |
| [37] | maize,<br>tomato                                                | United States | 6  | no  | yes | yes |
| [38] | maize, soy-<br>bean                                             | United States | 4  | no  | no  | no  |
| [39] | melon, wa-<br>termelon                                          | Turkey        | 6  | no  | no  | yes |
| [40] | tomato,<br>wheat                                                | Italy         | 2  | no  | no  | no  |
| [41] | maize, soy-<br>bean                                             | United States | 2  | yes | yes | no  |
| [42] | maize, soy-<br>bean                                             | United States | 4  | no  | no  | no  |
| [43] | rice                                                            | France        | 9  | no  | no  | no  |
| [44] | hazelnut                                                        | Turkey        | 1  | no  | yes | no  |
| [45] | tomato,<br>maize                                                | United States | 45 | no  | yes | yes |
| [46] | maize, soy-<br>bean                                             | United States | 2  | yes | yes | no  |

|      |                                                           |               |    |     |     |     |
|------|-----------------------------------------------------------|---------------|----|-----|-----|-----|
| [47] | barley, wheat                                             | Denmark       | 78 | no  | yes | yes |
| [48] | tomato                                                    | United States | 1  | yes | yes | no  |
| [49] | maize                                                     | United States | 3  | no  | yes | no  |
| [50] | safflower                                                 | United States | 1  | no  | no  | no  |
| [51] | maize                                                     | Greece        | 9  | no  | no  | yes |
| [52] | flax                                                      | Canada        | 1  | no  | yes | yes |
| [53] | cotton,<br>chili, wheat,<br>soybean,<br>sorghum,<br>maize | India         | 12 | no  | yes | yes |
| [54] | soybean,<br>wheat, maize                                  | United States | 38 | no  | yes | yes |
| [55] | pea grain                                                 | Bulgaria      | 1  | no  | no  |     |
| [56] | strawberry                                                | United States | 3  | no  | yes | yes |
| [57] | maize                                                     | United States | 3  | no  | yes | no  |
| [58] | wheat                                                     | India         | 12 | no  | yes | no  |
| [59] | soybean,<br>wheat                                         | India         | 8  | no  | no  | no  |
| [60] | kiwi                                                      | New Zealand   | 2  | no  | no  | no  |
| [61] | apricot                                                   | Turkey        | 3  | no  | no  | yes |
| [62] | fig                                                       | Turkey        | 3  | no  | no  | no  |
| [63] | raisins                                                   | Turkey        | 3  | no  | no  | yes |
| [64] | strawberry                                                | Canada        | 8  | no  | yes | no  |
| [65] | maize, soy-<br>bean, oat                                  | United States | 6  | no  | no  | no  |

|      |                                    |                |    |    |     |     |
|------|------------------------------------|----------------|----|----|-----|-----|
| [66] | chard,<br>pumpkin,<br>tomato, bean | Spain          | 4  | no | yes | no  |
| [67] | rye                                | Germany        | 2  | no | yes | no  |
| [68] | sweet potato                       | United States  | 2  | no | no  | yes |
| [69] | wheat, oat,<br>barely              | Estonia        | 3  | no | no  | yes |
| [70] | potato                             | Estonia        | 2  | no | yes | no  |
| [71] | banana                             | Ecuador        | 1  | no | yes | no  |
| [72] | tomato                             | Taiwan         | 3  | no | yes | yes |
| [73] | buckwheat                          | Czech Republic | 9  | no | no  | no  |
| [74] | wheat                              | Canada         | 1  | no | yes | yes |
| [75] | barley, wheat                      | Sweden         | 2  | no | yes | yes |
| [76] | wheat                              | Australia      | 2  | no | yes | yes |
| [77] | wheat, oat,<br>soybean,<br>maize   | United States  | 4  | no | no  | no  |
| [78] | soybean                            | China          | 1  | no | yes | no  |
| [79] | maize                              | Iran           | 12 | no | no  | no  |
| [80] | oat, wheat,<br>barley              | Norway         | 86 | no | no  | no  |
| [81] | maize, soy-<br>bean                | United States  | 4  | no | yes | no  |
| [82] | cauliflower                        | Italy          | 20 | no | no  | yes |
| [83] | maize                              | United States  | 26 | no | yes | no  |

|       |                      |               |    |     |     |     |
|-------|----------------------|---------------|----|-----|-----|-----|
| [84]  | maize, soy-bean      | United States | 3  | no  | yes | no  |
| [85]  | maize, tomato, wheat | United States | 28 | no  | yes | no  |
| [86]  | coffee               | Costa Rica    | 3  | no  | yes | yes |
| [87]  | strawberry           | Turkey        | 5  | no  | no  | yes |
| [88]  | potato, wheat        | Switzerland   | 18 | yes | yes | yes |
| [89]  | potato               | Italy         | 1  | no  | no  | yes |
| [90]  | soybean, maize, oat  | United States | 10 | no  | no  | no  |
| [91]  | grapes               | Italy         | 3  | no  | no  | yes |
| [92]  | coffee               | Nicaragua     | 3  | no  | yes |     |
| [93]  | maize, tomato        | United States | 5  | no  | yes | no  |
| [94]  | sunflower            | Italy         | 3  | no  | yes | yes |
| [95]  | wheat                | Italy         | 2  | no  | yes | no  |
| [96]  | potato               | Portugal      | 2  | no  | no  | yes |
| [97]  | leek                 | Croatia       | 4  | no  | no  | yes |
| [98]  | apple                | United States | 4  | no  | no  | yes |
| [99]  | apple                | United States | 4  | no  | no  | no  |
| [100] | maize                | Italy         | 3  | no  | yes | no  |
| [101] | tomato               | United States | 6  | no  | yes | no  |
| [102] | lettuce              | Turkey        | 5  | no  | yes | yes |
| [103] | tomato               | Turkey        | 5  | no  | no  | no  |

|       |                                                   |               |    |     |     |     |
|-------|---------------------------------------------------|---------------|----|-----|-----|-----|
| [104] | maize, oat,<br>soybean,<br>alfalfa                | United States | 24 | no  | yes | yes |
| [105] | maize, soy-<br>bean                               | United States | 8  | no  | yes | no  |
| [106] | peach                                             | United States | 2  | no  | no  | no  |
| [107] | carrot, beet-<br>root, rye,<br>potato             | Germany       | 8  | yes | yes | no  |
| [108] | rye                                               | Germany       | 2  | no  | yes | no  |
| [109] | wheat                                             | United States | 1  | no  | yes | no  |
| [110] | apple                                             | United States | 2  | yes | yes | yes |
| [111] | tomato                                            | Tunisia       | 12 | no  | yes | yes |
| [112] | sweet corn,<br>cucumber,<br>pepper                | United States | 3  | no  | yes | no  |
| [113] | wheat                                             | Australia     | 1  | no  | yes | no  |
| [114] | maize, soy-<br>bean                               | United States | 82 | no  | no  | yes |
| [115] | cabbage,<br>onion, sweet<br>corn, bean,<br>tomato | Canada        | 5  | no  | yes | no  |
| [116] | potato                                            | Latvia        | 2  | no  | no  | no  |
| [117] | muskmelon                                         | China         | 4  | no  | no  | no  |
| [118] | wheat                                             | Canada        | 2  | no  | yes | yes |



|       |                                                    |               |    |     |     |     |
|-------|----------------------------------------------------|---------------|----|-----|-----|-----|
| [119] | elephant foot<br>yam                               | India         | 5  | no  | no  | no  |
| [120] | apple                                              | United States | 1  | no  | yes | no  |
| [121] | cotton                                             | United States | 2  | no  | yes | no  |
| [122] | pepper                                             | Poland        | 3  | no  | no  | yes |
| [123] | wheat, oat,<br>barley                              | Estonia       | 9  | no  | no  | yes |
| [124] | maize, wheat                                       | United States | 13 | no  | yes | yes |
| [125] | tomato,<br>maize, saf-<br>flower, bean             | United States | 8  | no  | no  | no  |
| [126] | rye, oat,<br>onion, carrot,<br>cabbage,<br>lettuce | Denmark       | 72 | no  | no  | no  |
| [127] | oat, barley                                        | Sweden        | 3  | no  | yes | no  |
| [128] | sweet potato                                       | United States | 3  | no  | no  | yes |
| [129] | coffee                                             | Nicaragua     | 1  | no  | yes | no  |
| [130] | lettuce                                            | United States | 2  | no  | yes | yes |
| [131] | cabbage, car-<br>rot                               | Canada        | 6  | yes | yes | yes |
| [132] | sweet corn,<br>potato                              | Canada        | 6  | yes | yes | yes |
| [133] | flax, wheat                                        | Canada        | 13 | no  | yes | yes |
| [134] | grapes                                             | Australia     | 1  | no  | no  | no  |

|       |                          |               |   |    |     |    |
|-------|--------------------------|---------------|---|----|-----|----|
| [135] | soybean,<br>wheat, maize | United States | 3 | no | yes | no |
|-------|--------------------------|---------------|---|----|-----|----|

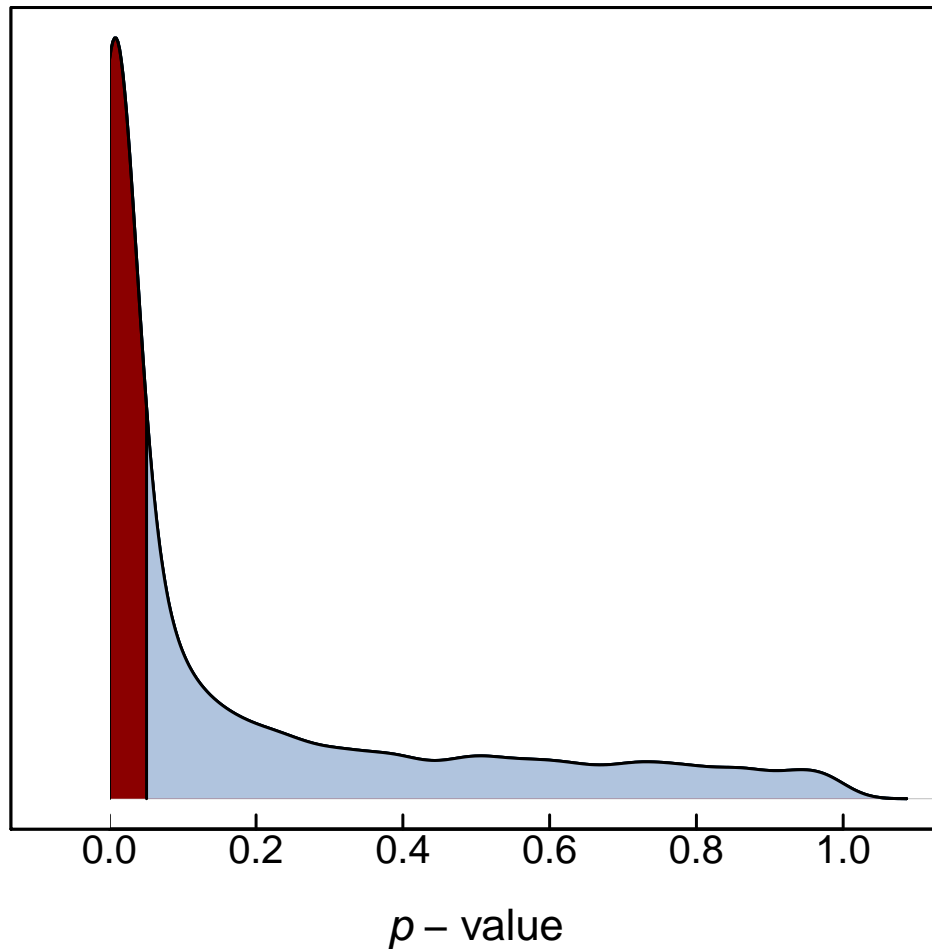

**Figure S1:** The distribution of  $p$ -values when the null hypothesis was forced to be true using the data and analysis type present in Seufert et al. [1]. If the analysis procedure was valid for these data, the distribution of P-values should be uniform between 0 and 1. Instead it is sharply shifted toward low P-values. In over 50% of simulations, the null hypothesis was rejected using a nominal Type I error rate of 0.05 (red region above).

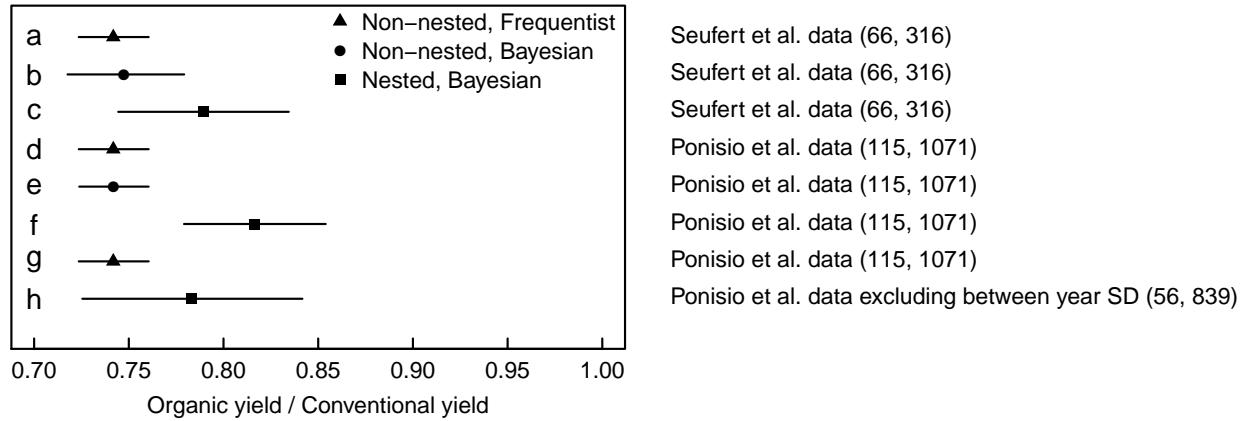

**Figure S2:** The effect of different models, data, and statistical paradigms on the organic to conventional yield ratio (from top to bottom): (a) Seufert et al.'s [1] non-nested analysis and data not accounting for pseudo-replication (organic to conventional ratio  $75\% \pm 4\%$ ), (b) Seufert et al.'s [1] non-nested analysis and data conducted in a Bayesian framework to show the comparability in results between the two paradigms ( $75\% \pm 4\%$ ), (c) our nested analysis accounting for the hierarchy of the meta-dataset on the data published by Seufert et al. [1] in a Bayesian framework ( $79\% \pm 4.5\%$ ), (d) Seufert et al.'s [1] non-nested analysis on our larger dataset in a frequentist framework ( $74\% \pm 2\%$ ), (e) Seufert et al.'s [1] non-nested analysis on our larger dataset in a Bayesian framework ( $74\% \pm 2\%$ ), (f) our analysis and full meta-dataset ( $80.8\% \pm 3.7\%$ ), (g) an unweighted, non-nested analysis on our meta-dataset ( $74\% \pm 2\%$ ), and (h) our nested analysis on our meta-dataset excluding studies where the between year variation was used as an estimate of the observation-level sampling variance ( $78\% \pm 5.8\%$ ). The number of studies and organic to conventional comparisons are indicated in parentheses. We could not re-analyze de Ponti et al.'s [2] data because they did not extract the response ratio variances necessary for our model.

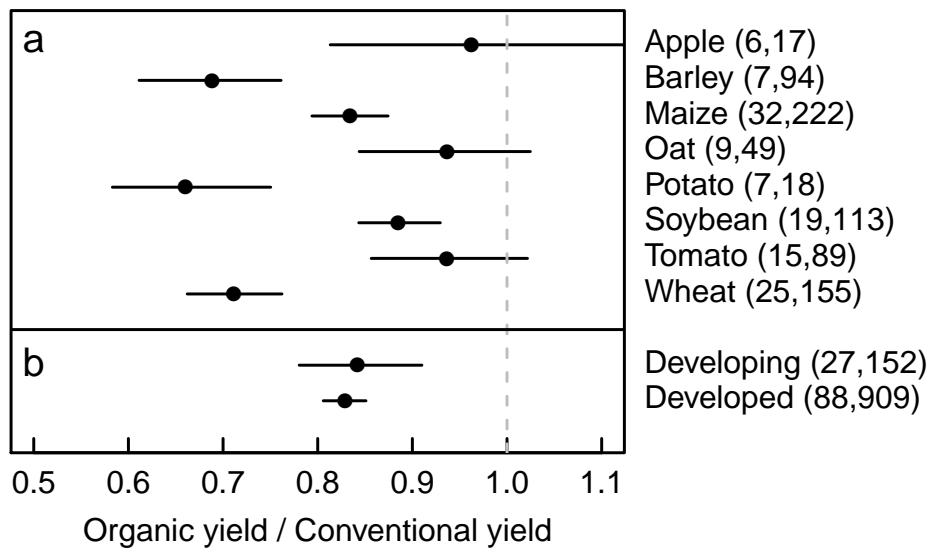

**Figure S3:** The influence of (a) crop species and (b) country development on the organic-to-conventional yield ratio. Values are mean effect sizes with 95% credible intervals. The number of studies and observations in each category are shown in parentheses. Only categories with at least 10 yield comparisons from greater than 5 studies are shown.

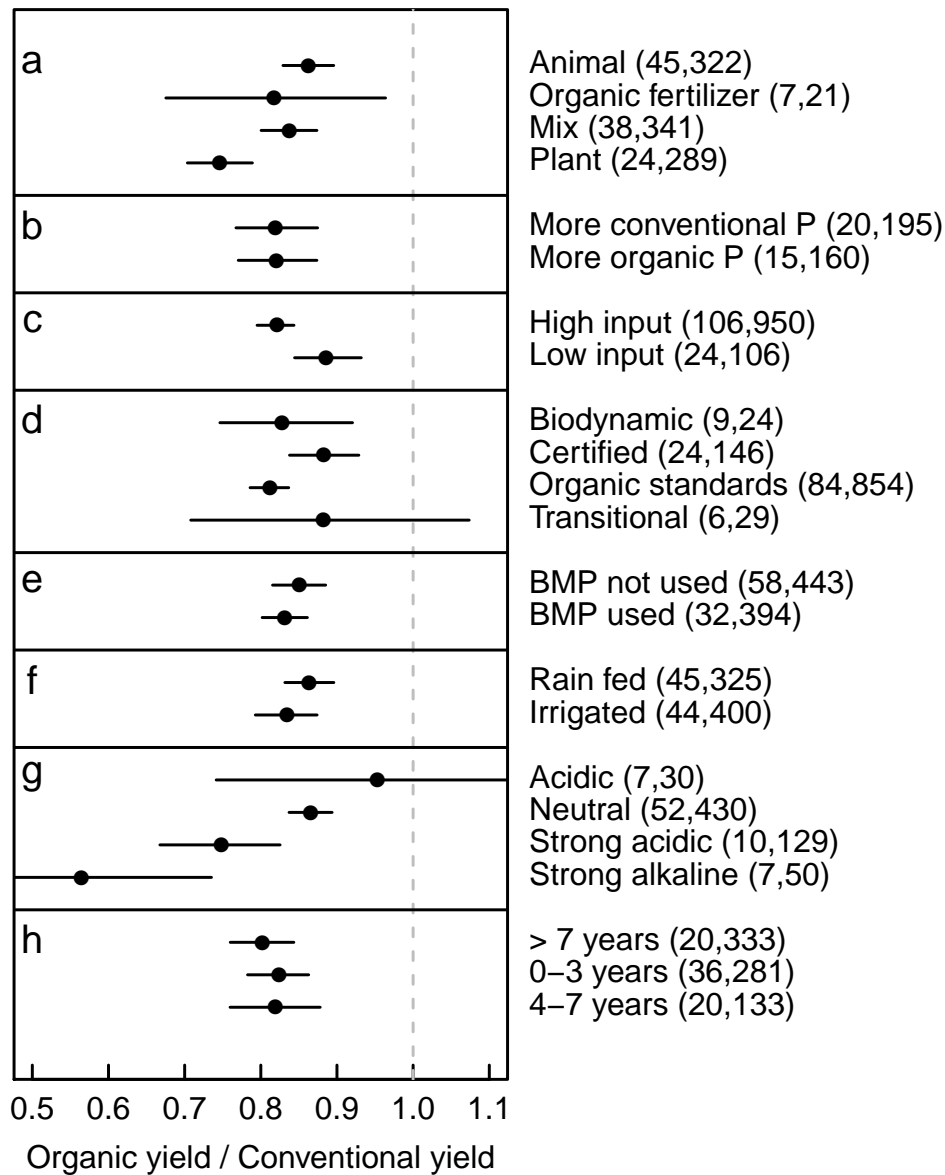

**Figure S4:** The influence of management practices on the organic-to-conventional yield ratio including (a) organic fertilizer type, (b) phosphorus input, (c) conventional system type, (d) organic system type, (e) the use of best management practices, (f) irrigation, (g) soil pH, and (h) years since conversion to organic agriculture. With respect to the low input conventional system type, the papers self-identified their system as “low input”, but the crops generally received substantial external inputs. The inputs were generally only applied if needed (i.e., if a soil test suggested the soil was nitrogen deficient, fertilizer was applied), and not on a set schedule as is common in high-input conventional systems. Values are mean effect sizes with 95% credible intervals. The number of studies and observations in each category are shown in parentheses. Only categories with at least 10 yield comparisons from greater than 5 studies are shown.

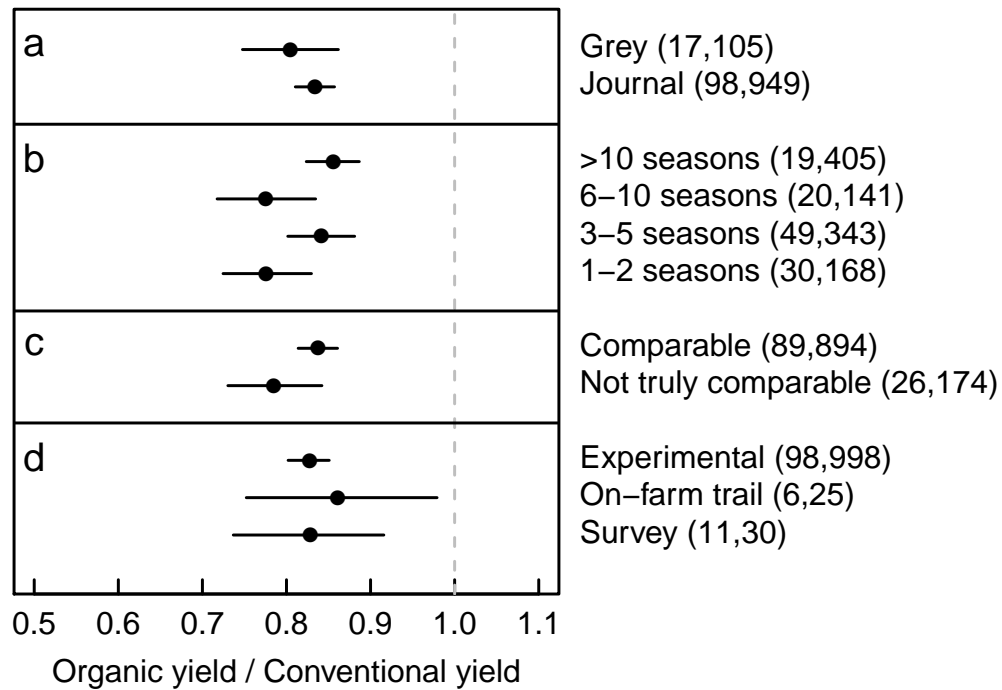

**Figure S5:** The sensitivity of the organic-to-conventional yield ratio to study quality factors including (a) publisher type, (b) duration of the study, (c) comparability of the organic and conventional treatments, and (d) the type of study. Values are mean effect sizes with 95% credible intervals. The number of studies and observations in each category are shown in parentheses. Only categories with at least 10 yield comparisons from greater than 5 studies are shown.

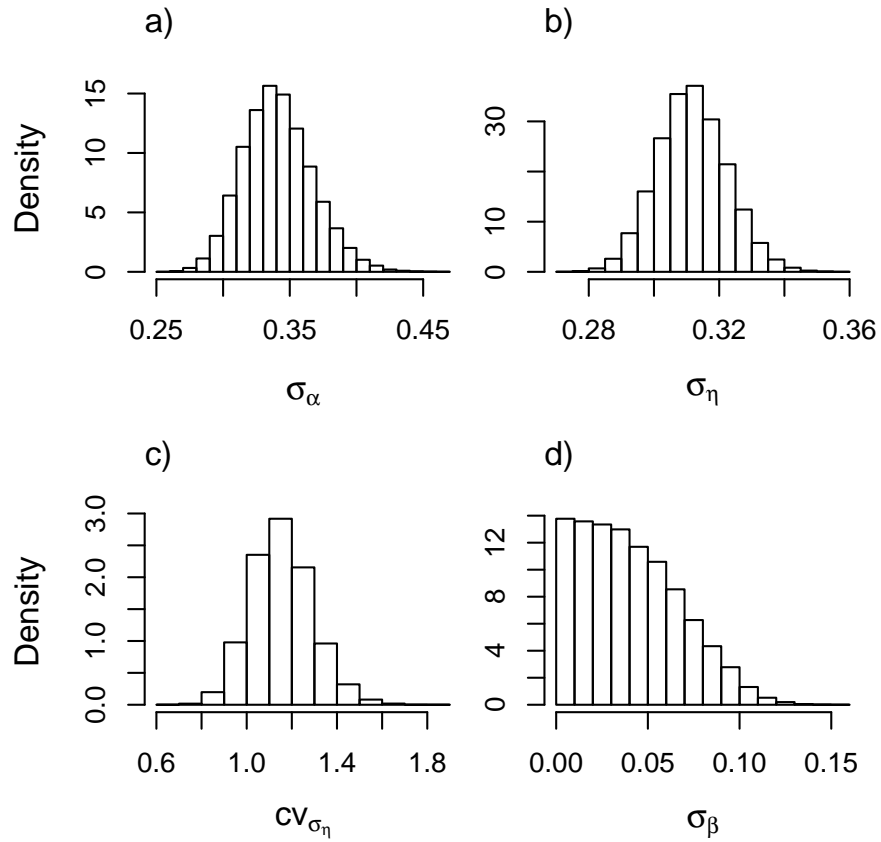

**Figure S6:** The posterior distributions for the random effect of a) study ( $\sigma_\alpha$ ); b) response ratios within a year ( $\sigma_\eta$ ); c) response ratios within a year where the within year variance is study-specific,  $CV_{\sigma_\eta}$  is the coefficient of variation ( $1/\sqrt{shape}$ ) of the gamma distribution (this model is most supported by the data); and d) between year ( $\sigma_\beta$ ). Including a between-year variance term was not supported by the data (the posterior for ( $\sigma_\beta$  is not differentiated from zero).



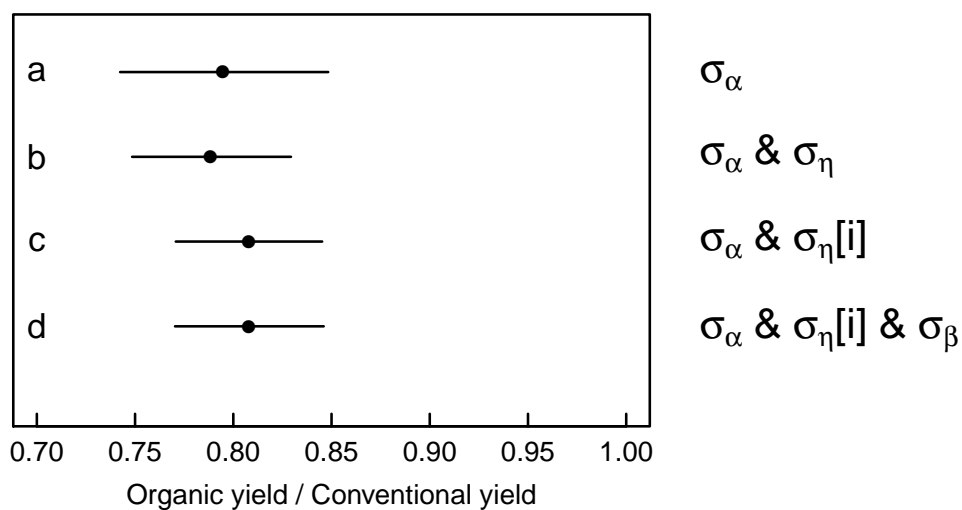

**Figure S7:** The sensitivity of the yield gap to including different levels of hierarchy in the model. The random effects included in the model are: a) study ( $\sigma_\alpha$ ); b) study and response ratios within a year ( $\sigma_\eta$ ); c) study and response ratios within a year where the within year variance is study-specific ( $\sigma_\eta[i]$ ) (this model is most supported by the data); and d) study, study-specific within-year variance, and between year ( $\sigma_\beta$ ). Including a between-year variance term was not supported by the data (the posterior for  $\sigma_\beta$  is not differentiated from zero). Values are the posterior mean with 95% credible intervals.

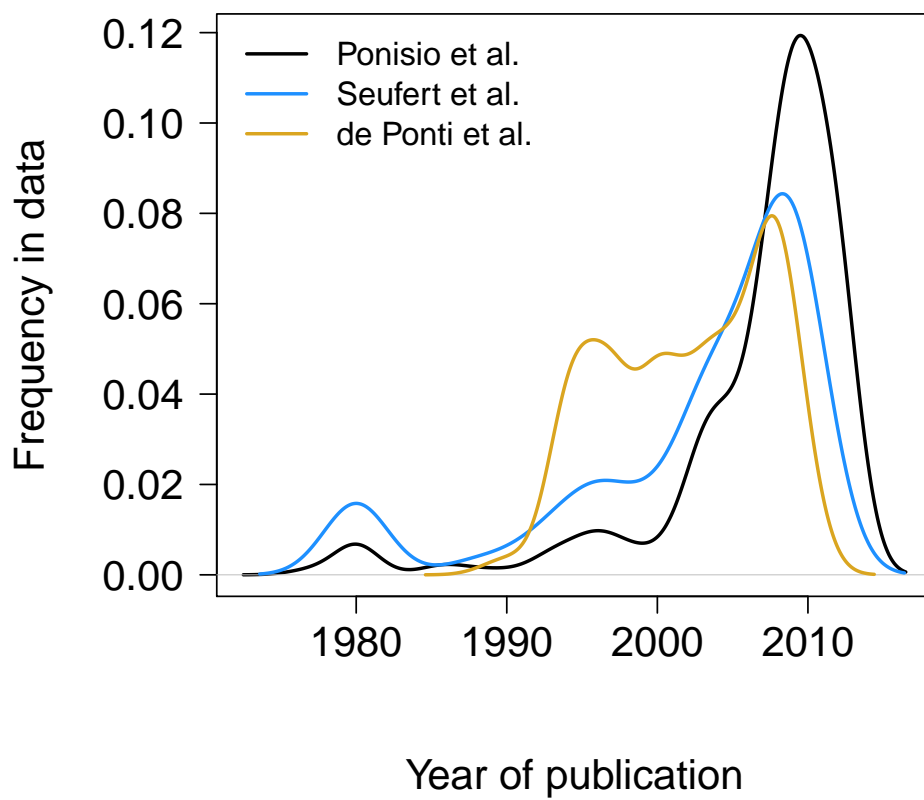

**Figure S8:** A comparison of the frequency of organic to conventional yield comparisons published in different years from our study, de Ponti et al. [2] and Seufert et al. [1].

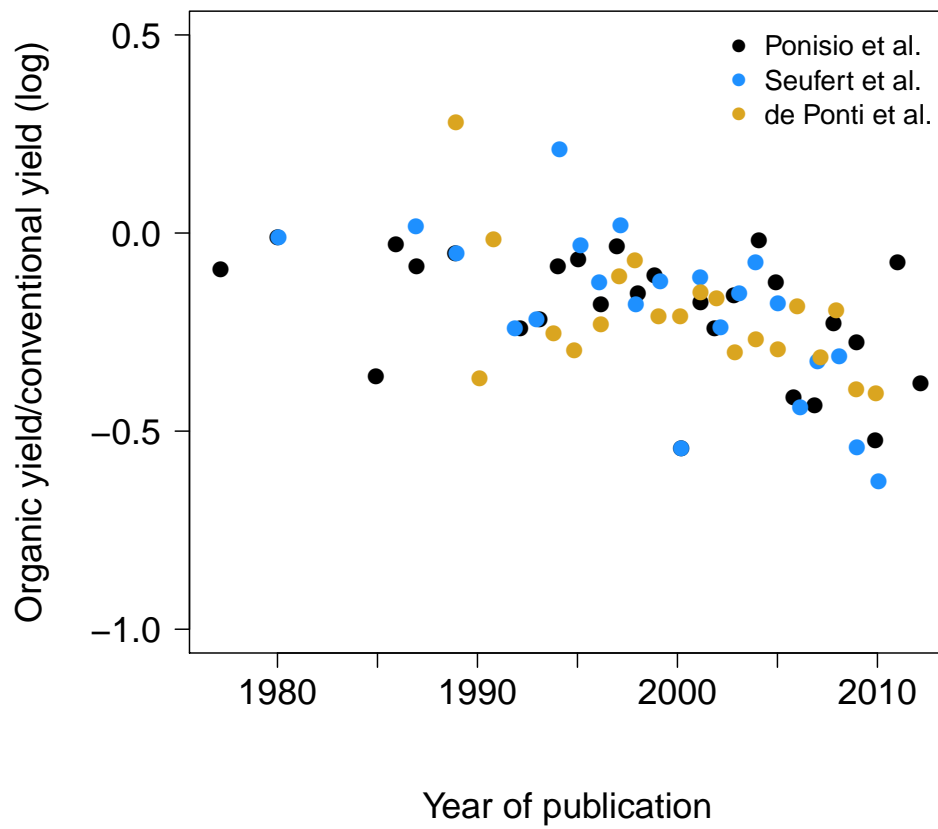

**Figure S9:** The mean organic to conventional yield ratio (log) for each year studies were published from our study, de Ponti et al. [2] and Seufert et al. [1]

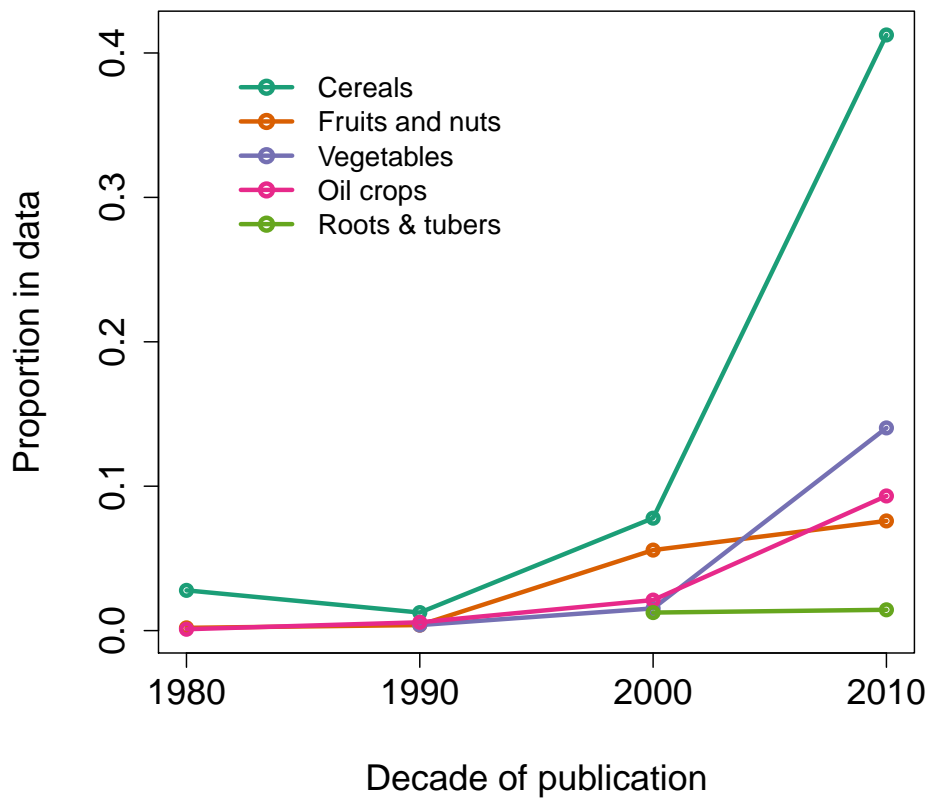

**Figure S10:** The proportion of observations of each crop species (binned by decade) in our meta-dataset.

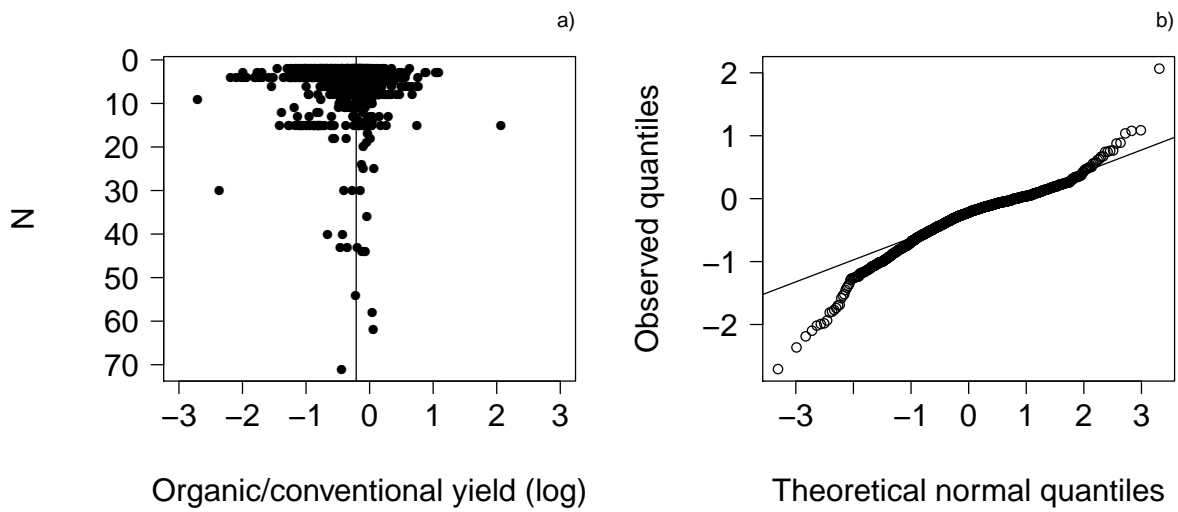

**Figure S11:** A funnel plot and QQ-plot of the response ratios in our study's meta-dataset.
